# Supplementary material for: Sja-Let-7 Attenuates Carbon Tetrachloride-Induced Liver Fibrosis in a Mouse Model via Col1α2
Source: MDPI journal article supplement (doi:10.3390/biology12121465), 2023-11-24
Supplement: s1 [file s1]

## **Contents:**

### **1. Supplementary figures and figure legends**

Supplementary Figure S1

Supplementary Figure S2

Supplementary Figure S3

Supplementary Figure S4

### **2. Supplementary tables**

Supplementary Table S1

Supplementary Table S2

Supplementary Table S3

Supplementary Table S4

## Supplementary figures and figure legends

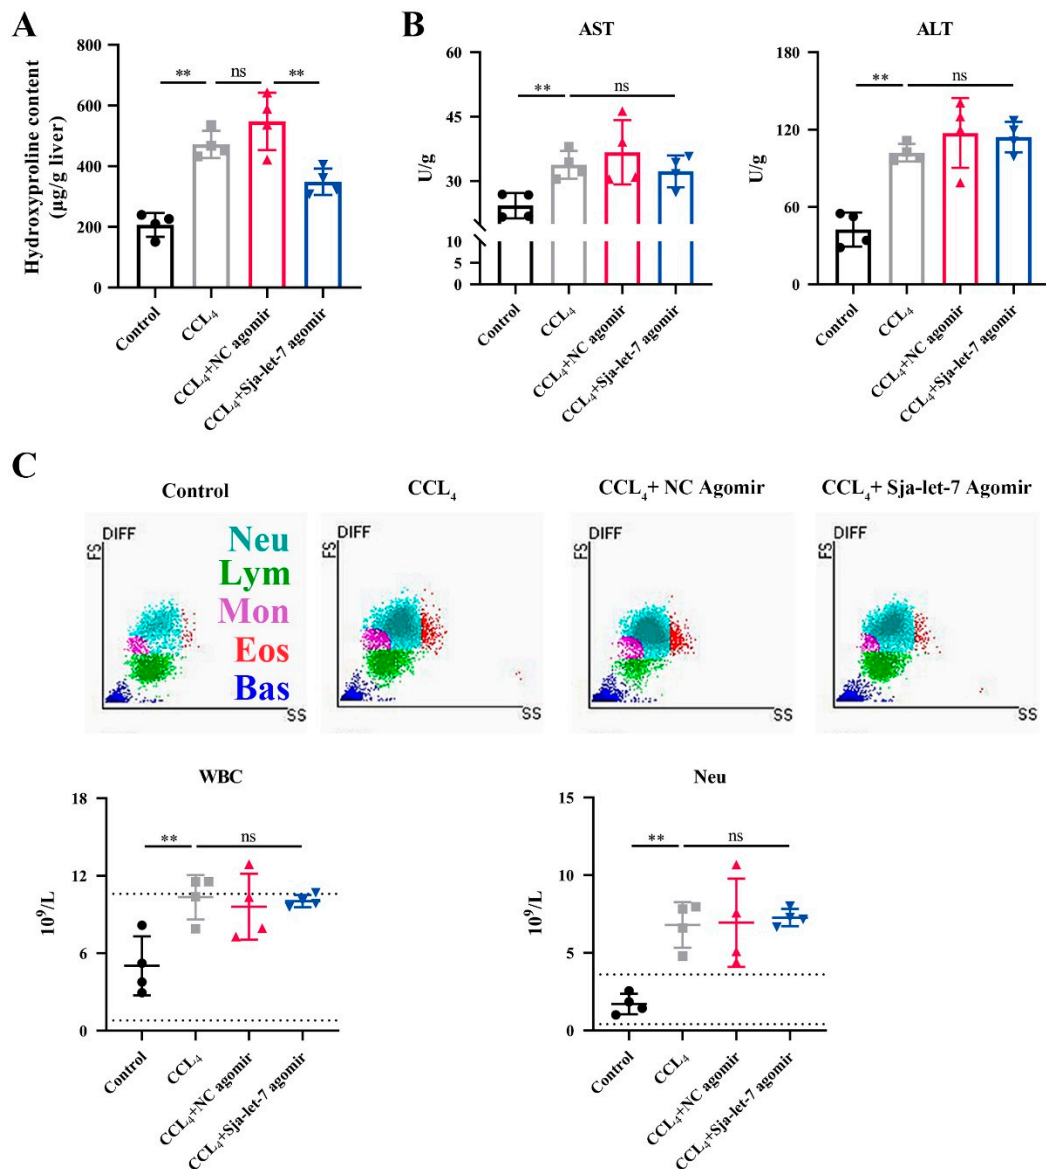

**Supplementary Figure S1. Hydroxyproline, AST and ALT content in the liver and hematological index from mice treated with sja-let-7 agomir. A.** Hydroxyproline content; **B.** AST and ALT content; **C.** Hematological index. Each individual is represented by one dot. All graph data are expressed as the mean  $\pm$  SD of at least three biological replicates per group. \*\* $p < 0.01$ , ns, not significant. AST: aspartate aminotransferase, ALT: aminotransferase, WBC: White blood cells, Neu: neutrophil, Lym: lymphocyte, Mon: monocyte, Eos: eosinophil and Bas: basophil.

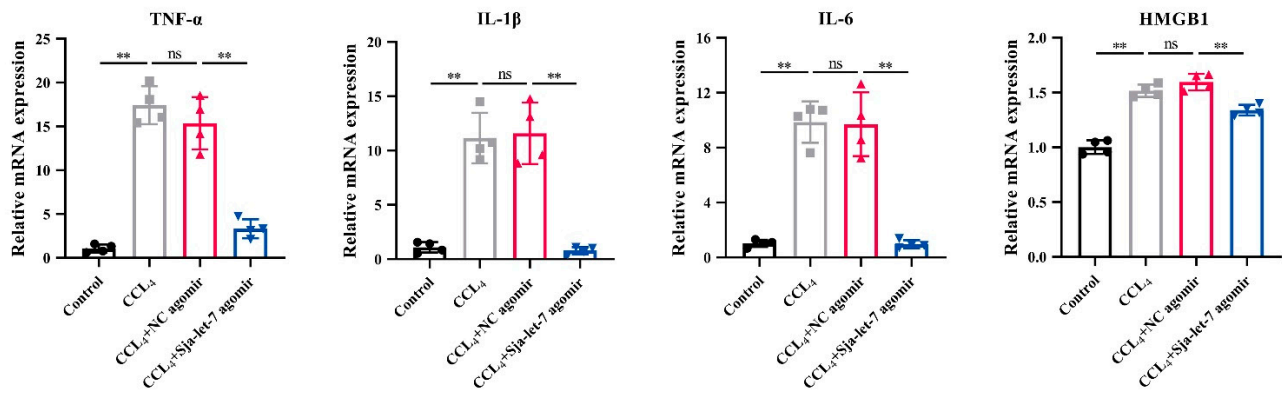

**Supplementary Figure S2. mRNA expression of pro-inflammatory cytokines TNF- $\alpha$ , IL-1 $\beta$ , IL-6 and HMGB1.** Each individual is represented by one dot. All graph data are expressed as the mean  $\pm$  SD of at least three biological replicates per group. \*\* $p < 0.01$ , ns, not significant.

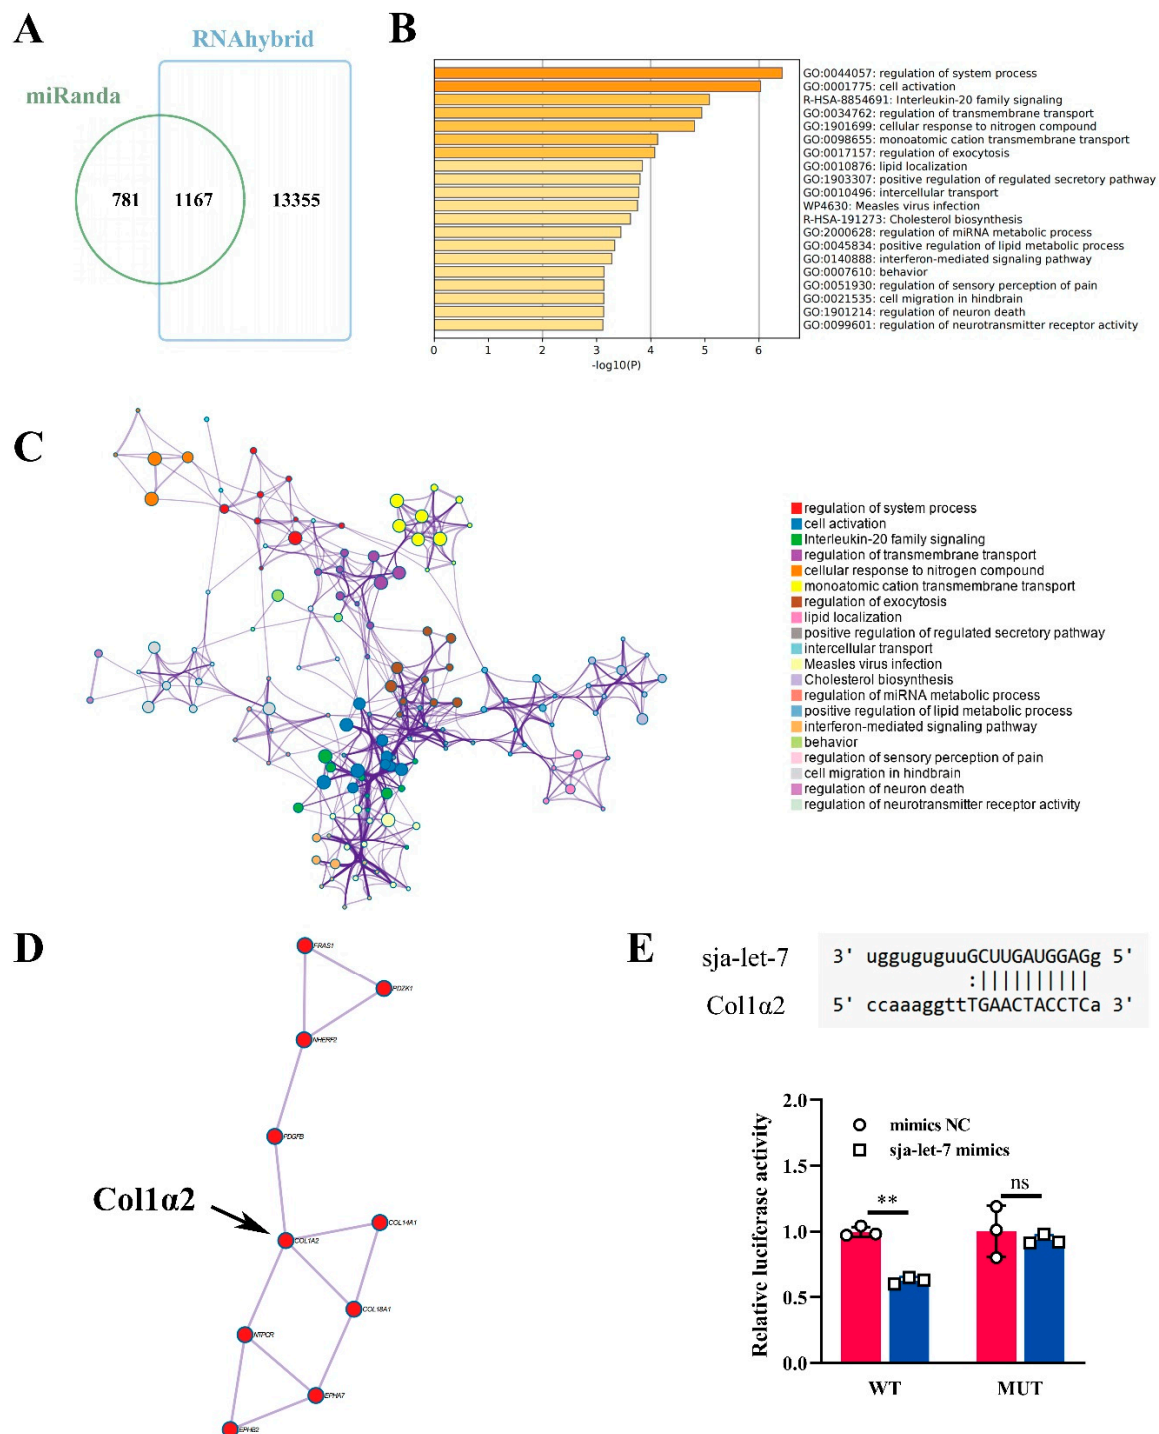

**Supplementary Figure S3. Coll1a2/TGF- $\beta$ /Smad axis is the targeting pathway of sja-let-7. A.**

Venn diagram showing 1167 potential target genes overlap in miRanda and RNAhybrid database; **B.**

Bar graph of enriched terms; **C.** PPI networks identified in 1167 potential target genes; **D.** and

MCODE component related to Coll1a2; **E.** The dual-luciferase reporter assay. Each individual is

represented by one dot. All graph data are expressed as the mean  $\pm$  SD of at least three biological

replicates per group. \*\* $p < 0.01$ , ns, not significant. WT: wild type, MUT: mutant.

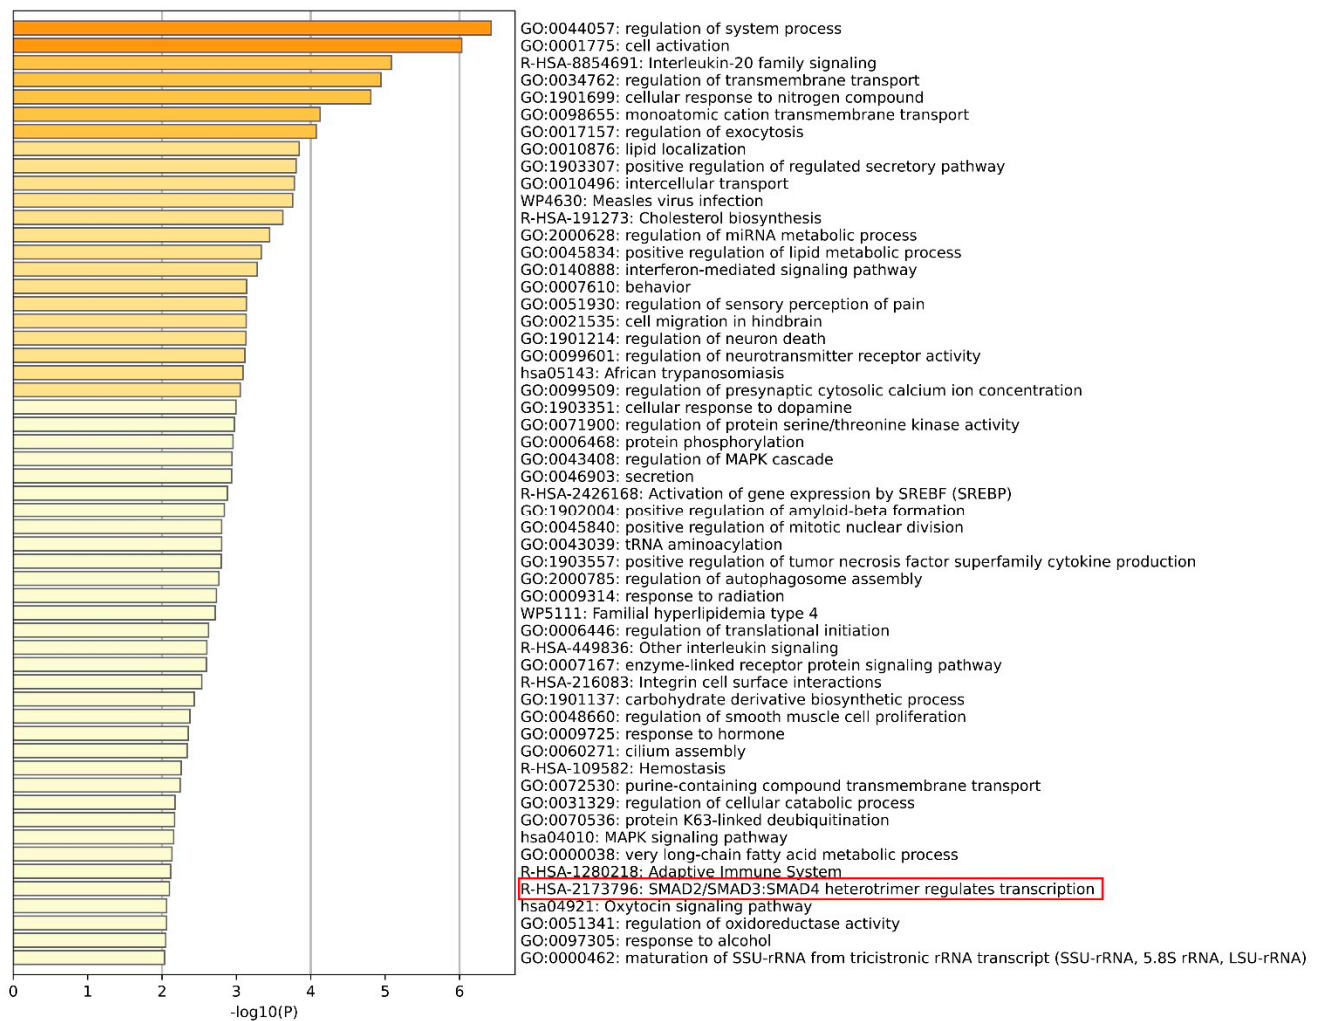

**Supplementary Figure S4.** Top 55 enriched terms related to 1167 target genes of sj-a-let-7.

## Supplementary tables

**Supplementary Table S1** The sequence of miRNA mimics, inhibitor and agomir.

| Name             | Sense sequence (5'-3') | Anti-sense sequence (5'-3') |
|------------------|------------------------|-----------------------------|
| Sja-let-7 agomir | GGAGGUAGUUCGUUGUGUGGU  | CACACAACGAACUACCUCCUU       |
| NC agomir        | UUCUCCGAACGUGUCACGUTT  | ACGUGACACGUUCGGAGAATT       |
| Sja-let-7 mimics | GGAGGUAGUUCGUUGUGUGGU  | CACACAACGAACUACCUCCUU       |
| NC mimics        | UUCUCCGAACGUGUCACGUTT  | ACGUGACACGUUCGGAGAATT       |

Supplementary Table S2 Antibodies used in the experiment

| Experiments                 | Primary antibody | Source<br>(Catalogue No.) | Host   | Working conditions | Secondary antibody                                     | Source<br>(Catalogue No.) | Working conditions |
|-----------------------------|------------------|---------------------------|--------|--------------------|--------------------------------------------------------|---------------------------|--------------------|
| Immunohistochemical assay   | TGF-β1           | Servicebio (GB11179)      | Rabbit | 1:500              | HRP conjugated Goat Anti-Rabbit IgG (H+L)              | Servicebio (GB23303)      | 1:200              |
|                             | p-SMAD2/3        | SAB (12241)               | Rabbit | 1:200              |                                                        |                           |                    |
|                             | α-SMA            | Servicebio (GB111364)     | Rabbit | 1:2000             |                                                        |                           |                    |
|                             | Col1α1           | Servicebio (GB11022)      | Rabbit | 1:1000             |                                                        |                           |                    |
|                             | Col1α2           | Proteintech (14695-1-AP)  | Rabbit | 1:500              |                                                        |                           |                    |
|                             | Col3α1           | Servicebio (GB111629)     | Rabbit | 1:500              |                                                        |                           |                    |
| Immunofluorescence analysis | α-SMA            | Servicebio (GB13044)      | Mouse  | 1:1000             | Cy5 conjugated Goat Anti-mouse IgG (H+L)               | Servicebio (GB27301)      | 1:400              |
|                             | Col1α1           | Servicebio (GB11022)      | Rabbit | 1:3000             | Cy3 conjugated Goat Anti-Rabbit IgG (H+L)              | Servicebio (GB21303)      | 1:300              |
|                             | Col3α1           | Servicebio (GB111629)     | Rabbit | 1:200              | Alexa Fluor® 488-conjugated Goat Anti-Rabbit IgG (H+L) | Servicebio (GB25303)      | 1:400              |

**Supplementary Table S3** Probes used in the FISH analysis.

| Probe name      | Sequence                          |
|-----------------|-----------------------------------|
| sja-let-7       | 5'-ACCACACAACGAACTACCTCC-3'       |
|                 | 5'-TGTCTTGCCCCATTCATTTGTCTTTTT-3' |
| Col1 $\alpha$ 2 | 5'-CAGGCGAGATGGCTTATTTGTTTTGT-3'  |
|                 | 5'-GGCATGTTGCTAGGCACGAAGTTACT-3'  |



**Supplementary Table S4** Primers used in the experiment

| Primer                  | Sequences (5'-3')           |
|-------------------------|-----------------------------|
| Mouse-GAPDH-F           | AACGGGAAGCCCATCACCATC       |
| Mouse-GAPDH-R           | AAGACACCAGTAGACTCCACGA      |
| Mouse-IL-1 $\beta$ -F   | ATGAAAGACGGCACACCCAC        |
| Mouse-IL-1 $\beta$ -R   | GCTTGTGCTCTGCTTGTGAG        |
| Mouse-IL-6-F            | TGCAAGAGACTTCCATCCAGT       |
| Mouse-IL-6-R            | GTGAAGTAGGGAAGGCCG          |
| Mouse-TNF $\alpha$ -F   | CAGCCGATGGGTTGTACCTT        |
| Mouse-TNF $\alpha$ -R   | TGTGGGTGAGGAGCACGTAGT       |
| Mouse-HMGB1-F           | GGCGAGCATCCTGGCTTATC        |
| Mouse-HMGB1-R           | GGCTGCTTGTCATCTGCTG         |
| Mouse- $\alpha$ -SMA-F  | TCAGCGCCTCCAGTTCCT          |
| Mouse- $\alpha$ -SMA-R  | AAAAAAAAACCACGAGTAACAAATCAA |
| Mouse-Coll $\alpha$ 1-F | ACGTCCTGGTGAAGTTGGTC        |
| Mouse-Coll $\alpha$ 1-R | CAGGGAAGCCTCTTTCTCCT        |
| Mouse-Coll $\alpha$ 2-F | CCAGGGCTGTTTTCCCATCC        |
| Mouse-Coll $\alpha$ 2-R | GCTCTGTGCTTCGTCACCCA        |
| Mouse-Col3 $\alpha$ 1-F | GCCCACAGCCTTCTACACCT        |
| Mouse-Col3 $\alpha$ 1-R | GCCAGGGTCACCATTCTC          |
| Mouse-TGF- $\beta$ 1-F  | ATTCCTGGCGTTACCTTGG         |
| Mouse-TGF- $\beta$ 1-R  | AGCCCTGTATTCCGTCTCCT        |
| Mouse-Smad2-F           | GTGGCATACTGGGAGGAGAA        |
| Mouse-Smad2-R           | TTGTTGTCCGAATTGAGCTG        |
| Mouse-Smad3-F           | GAGACATTCCACGCTTCACA        |
| Mouse-Smad3-R           | GCTGCATTCCGGTTAACATT        |
| Mouse-Smad7-F           | GTGTTGCTGTGAATCTTACG        |

---

|                     |                                                        |
|---------------------|--------------------------------------------------------|
| Mouse-Smad7-R       | AGAAGAAGTTGGGAATCTGA                                   |
| common-REVERSE      | CAGTGCAGGGTCCGAGGT                                     |
| mouse U6-RT-primer  | GTCGTATCCAGTGCAGGGTCCGAGGTATTCGCACTGGATACG<br>ACAAAAAT |
| mouse U6-FORWARD    | GAAGATTTAGCATGGCCCCTGC                                 |
| sja-let-7-RT-primer | GTCGTATCCAGTGCAGGGTCCGAGGTATTCGCACTGGATACG<br>ACACCACA |
| sja-let-7-FORWARD   | ACAACAACGGAGGTAGTTCGT                                  |

---
